# Supplementary material
Source: PubMed Central journal article supplement (PMC3675912)

**Table S1. *V. vulnificus* isolates included in this study**

| <b>Strain</b> | <b>Country and year of isolation</b> | <b>Source (seawater Temp. [°C] / Sal. [‰])</b> | <b>Reference, Strain collection</b> |
|---------------|--------------------------------------|------------------------------------------------|-------------------------------------|
| VN-0010       | Germany, 1994                        | Diseased human                                 | RKI, BfR*                           |
| VN-0016       | Germany, 1996                        | Seawater (SM/n.d.)                             | RKI, BfR*<br>Klinikum<br>Greifswald |
| VN-0092       | Germany, 2011                        | Diseased human                                 | Greifswald                          |
| VN-0094       | Denmark, 1994                        | Diseased human                                 | (1)                                 |
| VN-0095       | Denmark, 1994                        | Diseased human                                 | (1)                                 |
| VN-0096       | Denmark, 1994                        | Diseased human                                 | RKI, BfR*                           |
| VN-0097       | Denmark, 1994                        | Diseased human                                 | (3)                                 |
| VN-0098       | Denmark, 1994                        | Diseased human                                 | (3)                                 |
| ATCC 33149    | Japan                                | Diseased eel                                   | ATCC                                |
| VN-0100       | Germany, 2010                        | Seawater (SM/n.d.)                             | LAGuS                               |
| VN-0101       | Germany, 2010                        | Seawater (SM/n.d.)                             | LAGuS                               |

|            |               |                    |           |
|------------|---------------|--------------------|-----------|
| VN-0102    | Germany, 2010 | Seawater (SM/n.d.) | LAGuS     |
| VN-0103    | Germany, 2010 | Seawater (SM/6.7)  | LAGuS     |
| VN-0104    | Germany, 2010 | Seawater (SM/n.d.) | LAGuS     |
| VN-0105    | Germany, 2010 | Seawater (SM/n.d.) | LAGuS     |
| VN-0108    | Germany, 2010 | Diseased human     | LAGuS     |
| VN-0112    | Germany, 2010 | Diseased human     | LAGuS     |
| VN-0119    | Denmark, 1997 | mussel             | RKI, BfR* |
| VN-0120    | Denmark, 1997 | mussel             | RKI, BfR* |
| ATCC 27562 | U.S.A.        | Diseased human     | ATCC      |
| VN-0125    | Denmark, 1994 | Diseased human     | (1)       |
| VN-0126    | Denmark, 1994 | Diseased human     | (1)       |
| VN-0127    | Denmark, 1994 | Diseased human     | (1)       |
| VN-0128    | Denmark, 1994 | Diseased human     | (1)       |
| VN-0129    | Denmark, 1994 | Diseased human     | (1)       |
| VN-0130    | Denmark, 1994 | Diseased human     | (1)       |
| VN-0131    | Denmark, 1994 | Diseased human     | (1)       |

|         |               |                      |           |
|---------|---------------|----------------------|-----------|
| VN-0132 | Denmark, 1994 | Diseased human       | (1)       |
| VN-0133 | Denmark, 1994 | Diseased human       | (1)       |
| VN-0143 | Sweden, 1991  | Diseased eel         | (3)       |
| VN-0204 | Denmark, 1994 | Seawater             | (3)       |
| VN-0205 | Germany, 1995 | Seawater (SM/n.d.)   | RKI, BfR* |
| VN-0206 | Germany, 1995 | Seawater (SM/n.d.)   | RKI, BfR* |
| VN-0207 | Germany, 1999 | Seawater (22.0/n.d.) | RKI, BfR* |
| VN-0208 | Germany, 1999 | Seawater (13.0/n.d.) | RKI, BfR* |
| VN-0209 | Germany, 1999 | Seawater (17.0/n.d.) | RKI, BfR* |
| VN-0227 | Germany, 2004 | Seawater (21.7/7.4)  | LAGuS     |
| VN-0235 | Germany, 2006 | Seawater (24.2/6.8)  | LAGuS     |
| VN-0239 | Germany, 2006 | Seawater (24.0/7.2)  | LAGuS     |
| VN-0243 | Germany, 2006 | Seawater (24.2/6.8)  | LAGuS     |
| VN-0251 | Germany, 2006 | Seawater (20.0/7.1)  | LAGuS     |
| VN-0260 | Germany, 2007 | Seawater (20.4/7.4)  | LAGuS     |
| VN-0264 | Germany, 2007 | Seawater (19.2/7.1)  | LAGuS     |

|         |               |                     |           |
|---------|---------------|---------------------|-----------|
| VN-0266 | Germany, 2007 | Seawater (n.d./8.1) | LAGuS     |
| VN-0270 | Germany, 2008 | Seawater (16.2/6.3) | LAGuS     |
| VN-0274 | Germany, 2008 | Seawater (20.9/7.6) | LAGuS     |
| VN-0275 | Germany, 2008 | Seawater (18.6/7.8) | LAGuS     |
| VN-0276 | Germany, 2008 | Seawater (16.7/7.4) | LAGuS     |
| VN-0277 | Germany, 2008 | Seawater (17.9/7.0) | LAGuS     |
| VN-0280 | Germany, 2011 | Seawater (19.5/5.4) | LAGuS     |
| MO6-24  | U.S.A.        | Diseased human      | (4,5)     |
| CMCP6   | South Korea   | Diseased human      | (2)       |
| VN-0288 | Germany, 2010 | Diseased human      | RKI, BfR* |

---

\*RKI,BfR, Strain collection of Robert Koch-Institute (RKI), now in collection of National Reference Laboratory for Monitoring Bacteriological Contamination of Bivalve Molluscs of BfR, LAGuS, Landesamt für Gesundheit und Soziales, Rostock, Germany.

#### Reference List

1. **Dalsgaard, A., N. Frimodt-Moeller, B. Bruun, L. Høi, and J. L. Larsen.** 1996. Clinical manifestations and molecular epidemiology of *Vibrio vulnificus* infections in Denmark. *Eur.J.Clin.Microbiol.Infect.Dis.* **15**:227-232.

2. **Kim, Y. R., S. E. Lee, C. M. Kim, S. Y. Kim, E. K. Shin, D. H. Shin, S. S. Chung, H. E. Choy, A. Progulsk-Fox, J. D. Hillman, M. Handfield, and J. H. Rhee.** 2003. Characterization and pathogenic significance of *Vibrio vulnificus* antigens preferentially expressed in septicemic patients. *Infect.Immun.* **71**:5461-5471.
3. **Lewin, A., B. Bert, A. Dalsgaard, B. Appel, and L. Hoi.** 2000. A highly homologous 68 kbp plasmid found in *Vibrio vulnificus* strains virulent for eels. *J Basic Microbiol* **40**:377-384.
4. **Park, J. H., Y. J. Cho, J. Chun, Y. J. Seok, J. K. Lee, K. S. Kim, K. H. Lee, S. J. Park, and S. H. Choi.** 2011. Complete genome sequence of *Vibrio vulnificus* MO6-24/O. *Journal of Bacteriology* **193**:2062-2063.
5. **Wright, A. C., L. M. Simpson, J. D. Oliver, and J. Morris.** 1990. Phenotypic evaluation of acapsular transposon mutants of *Vibrio vulnificus*. *Infect.Immun.* **58**:1769-1773.

**Table S2. Allelic profiles of the 53 isolates tested (Bold: new ST types/alleles)**

| Strain        | Sequence type | Clonal complex (Burst) | <i>glp</i> | <i>gyrB</i> | <i>mdh</i> | <i>metG</i> | <i>purM</i> | <i>dtdS</i> | <i>lysA</i> | <i>pntA</i> | <i>pyrC</i> | <i>tnaA</i> |
|---------------|---------------|------------------------|------------|-------------|------------|-------------|-------------|-------------|-------------|-------------|-------------|-------------|
| VN-0010       | ST43          | 1                      | 7          | 7           | 9          | 9           | 8           | 21          | 11          | 8           | 7           | 18          |
| VN-0016       | <b>ST103</b>  | Singleton              | <b>49</b>  | <b>40</b>   | <b>44</b>  | 2           | 8           | 22          | <b>58</b>   | 5           | 11          | <b>50</b>   |
| VN-0092       | <b>ST118</b>  | Singleton              | 4          | 13          | 14         | 29          | 25          | 63          | 41          | 32          | 35          | <b>46</b>   |
| VN-0094       | <b>ST110</b>  | Singleton              | 38         | 1           | 12         | 31          | 27          | 23          | 36          | 1           | 48          | <b>47</b>   |
| VN-0095       | <b>ST110</b>  | Singleton              | 38         | 1           | 12         | 31          | 27          | 23          | 36          | 1           | 48          | <b>47</b>   |
| VN-0096       | <b>ST111</b>  | Singleton              | <b>51</b>  | <b>42</b>   | 41         | <b>41</b>   | 8           | 22          | 4           | <b>42</b>   | 14          | <b>48</b>   |
| VN-0097       | <b>ST112</b>  | Singleton              | 2          | 2           | 2          | 3           | 3           | <b>65</b>   | 4           | 5           | 5           | 25          |
| VN-0098       | <b>ST112</b>  | Singleton              | 2          | 2           | 2          | 3           | 3           | <b>65</b>   | 4           | 5           | 5           | 25          |
| ATCC<br>33149 | <b>ST112</b>  | Singleton              | 2          | 2           | 2          | 3           | 3           | <b>65</b>   | 4           | 5           | 5           | 25          |
| VN-0100       | <b>ST128</b>  | 2                      | 12         | 13          | 14         | 13          | 12          | 4           | 41          | 1           | 13          | 11          |
| VN-0101       | <b>ST113</b>  | 3                      | <b>50</b>  | 8           | 10         | 7           | 9           | 22          | 33          | 9           | 5           | 30          |
| VN-0102       | <b>ST114</b>  | Singleton              | 47         | <b>41</b>   | 11         | 23          | 8           | <b>64</b>   | <b>59</b>   | 5           | 14          | <b>49</b>   |

|               |              |           |           |           |           |    |    |           |           |           |           |           |
|---------------|--------------|-----------|-----------|-----------|-----------|----|----|-----------|-----------|-----------|-----------|-----------|
| VN-0103       | <b>ST100</b> | 4         | 13        | 14        | 15        | 7  | 9  | 34        | 6         | 15        | 19        | 39        |
| VN-0104       | <b>ST115</b> | 2         | 12        | <b>40</b> | 14        | 13 | 12 | 4         | 41        | 1         | 13        | 11        |
| VN-0105       | <b>ST116</b> | 5         | <b>49</b> | 2         | <b>44</b> | 7  | 8  | 22        | <b>57</b> | 15        | 5         | <b>50</b> |
| VN-0108       | <b>ST117</b> | 6         | 33        | 2         | 2         | 2  | 3  | 2         | <b>62</b> | 5         | <b>53</b> | <b>40</b> |
| VN-0112       | <b>ST118</b> | Singleton | 4         | 13        | 14        | 29 | 25 | <b>63</b> | 41        | 32        | 35        | <b>46</b> |
| VN-0119       | <b>ST130</b> | Singleton | 32        | 13        | 12        | 9  | 12 | 24        | 41        | 1         | 13        | 19        |
| VN-0120       | <b>ST119</b> | Singleton | 1         | 3         | 32        | 5  | 2  | <b>62</b> | 3         | 4         | <b>52</b> | 7         |
| ATCC<br>27562 | ST3          | Singleton | 2         | 2         | 1         | 2  | 1  | 10        | 1         | 2         | 4         | 9         |
| VN-0125       | <b>ST112</b> | Singleton | 2         | 2         | 2         | 3  | 3  | <b>65</b> | 4         | 5         | 5         | 25        |
| VN-0126       | <b>ST120</b> | 1         | 7         | 7         | 12        | 9  | 8  | 21        | 11        | <b>43</b> | 7         | 18        |
| VN-0127       | <b>ST121</b> | Singleton | 9         | 7         | 11        | 24 | 8  | <b>61</b> | <b>56</b> | 11        | 12        | 41        |
| VN-0128       | <b>ST110</b> | Singleton | 38        | 1         | 12        | 31 | 27 | 23        | 36        | 1         | 48        | <b>47</b> |
| VN-0129       | <b>ST110</b> | Singleton | 38        | 1         | 12        | 31 | 27 | 23        | 36        | 1         | 48        | <b>47</b> |
| VN-0130       | ST43         | 1         | 7         | 7         | 9         | 9  | 8  | 21        | 11        | 8         | 7         | 18        |
| VN-0131       | <b>ST122</b> | Singleton | 48        | 11        | <b>43</b> | 24 | 8  | 22        | <b>63</b> | 13        | 12        | 42        |

|         |              |           |           |           |           |           |    |           |           |    |    |           |
|---------|--------------|-----------|-----------|-----------|-----------|-----------|----|-----------|-----------|----|----|-----------|
| VN-0132 | ST43         | 1         | 7         | 7         | 9         | 9         | 8  | 21        | 11        | 8  | 7  | 18        |
| VN-0133 | <b>ST131</b> | 1         | 7         | 7         | 9         | 13        | 8  | 21        | 11        | 8  | 7  | 18        |
| VN-0143 | <b>ST112</b> | Singleton | 2         | 2         | 2         | 3         | 3  | <b>65</b> | 4         | 5  | 5  | 25        |
| VN-0204 | <b>ST112</b> | Singleton | 2         | 2         | 2         | 3         | 3  | <b>65</b> | 4         | 5  | 5  | 25        |
| VN-0205 | ST65         | Singleton | 13        | 14        | 15        | 7         | 9  | 40        | 6         | 25 | 5  | 4         |
| VN-0206 | <b>ST132</b> | 5         | <b>49</b> | <b>40</b> | <b>44</b> | 7         | 8  | 22        | 57        | 15 | 5  | <b>50</b> |
| VN-0207 | <b>ST123</b> | Singleton | 46        | 39        | <b>42</b> | <b>40</b> | 25 | 59        | 54        | 29 | 13 | 11        |
| VN-0208 | <b>ST105</b> | Singleton | 33        | 28        | 11        | 2         | 3  | 2         | 17        | 13 | 51 | 25        |
| VN-0209 | <b>ST124</b> | Singleton | 47        | 14        | 11        | 23        | 8  | <b>64</b> | 53        | 23 | 17 | 41        |
| VN-0227 | <b>ST125</b> | 7         | 34        | 13        | 14        | 13        | 25 | 27        | <b>61</b> | 29 | 13 | 30        |
| VN-0235 | <b>ST133</b> | 4         | 13        | 14        | 15        | 7         | 9  | 34        | 6         | 15 | 14 | 14        |
| VN-0239 | <b>ST133</b> | 4         | 13        | 14        | 15        | 7         | 9  | 34        | 6         | 15 | 14 | 14        |
| VN-0243 | <b>ST107</b> | 8         | 8         | 8         | 10        | 7         | 8  | 58        | 6         | 22 | 5  | 45        |
| VN-0251 | ST44         | 3         | 8         | 8         | 10        | 7         | 9  | 22        | 33        | 9  | 5  | 30        |
| VN-0260 | <b>ST126</b> | 9         | 8         | 8         | 10        | 3         | 9  | 22        | <b>55</b> | 15 | 49 | 44        |
| VN-0264 | <b>ST108</b> | Singleton | 8         | 38        | 10        | 3         | 9  | 22        | 33        | 15 | 50 | 44        |



|         |              |           |           |    |    |    |    |           |           |    |    |    |
|---------|--------------|-----------|-----------|----|----|----|----|-----------|-----------|----|----|----|
| VN-0266 | <b>ST113</b> | 3         | <b>50</b> | 8  | 10 | 7  | 9  | 22        | 33        | 9  | 5  | 30 |
| VN-0270 | <b>ST133</b> | 4         | 13        | 14 | 15 | 7  | 9  | 34        | 6         | 15 | 14 | 14 |
| VN-0274 | ST44         | 3         | 8         | 8  | 10 | 7  | 9  | 22        | 33        | 9  | 5  | 30 |
| VN-0275 | <b>ST133</b> | 4         | 13        | 14 | 15 | 7  | 9  | 34        | 6         | 15 | 14 | 14 |
| VN-0276 | <b>ST134</b> | 8         | 8         | 8  | 10 | 7  | 8  | 58        | 1         | 22 | 5  | 45 |
| VN-0277 | <b>ST127</b> | 9         | 8         | 8  | 10 | 3  | 8  | 22        | <b>55</b> | 15 | 49 | 44 |
| VN-0280 | <b>ST109</b> | Singleton | 45        | 2  | 20 | 2  | 9  | <b>60</b> | 26        | 20 | 17 | 43 |
| MO6-24* |              | Singleton | 5         | 3  | 18 | 14 | 14 | 7         | 2         | 17 | 22 | 13 |
| CMCP6*  |              |           | 3         | 3  | 3  | 4  | 4  |           |           | 1  | 1  |    |
| VN-0288 | <b>ST135</b> | 7         | 34        | 13 | 14 | 13 | 25 | 27        | 41        | 29 | 13 | 11 |

**Figure S1. SplitsTree networks for the 10 housekeeping genes analyzed in the study.**

*dtdS*

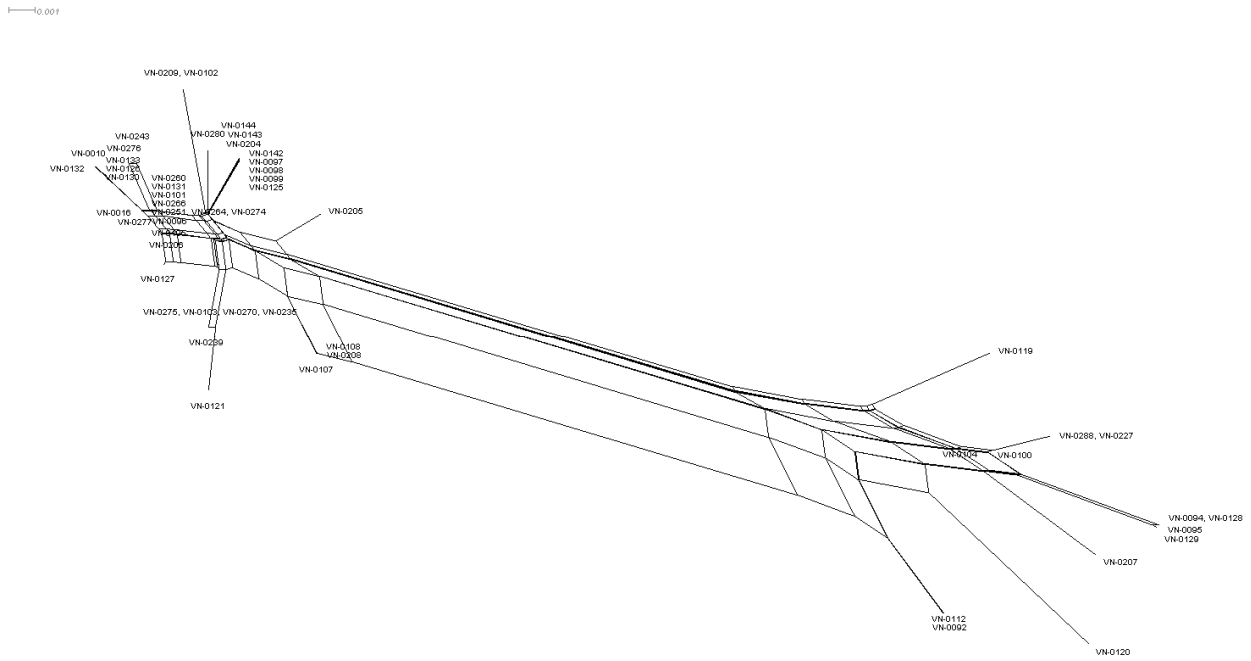

glp

1:10,000

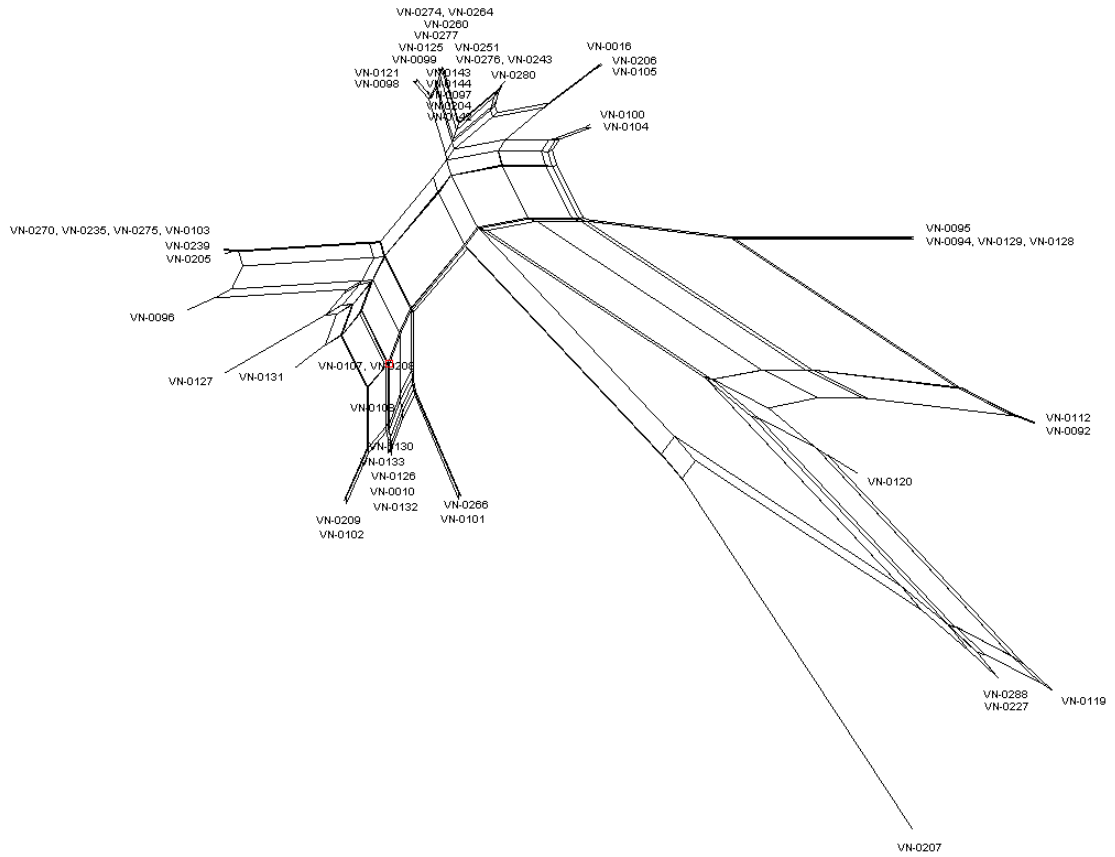

*gyrB*

10,001

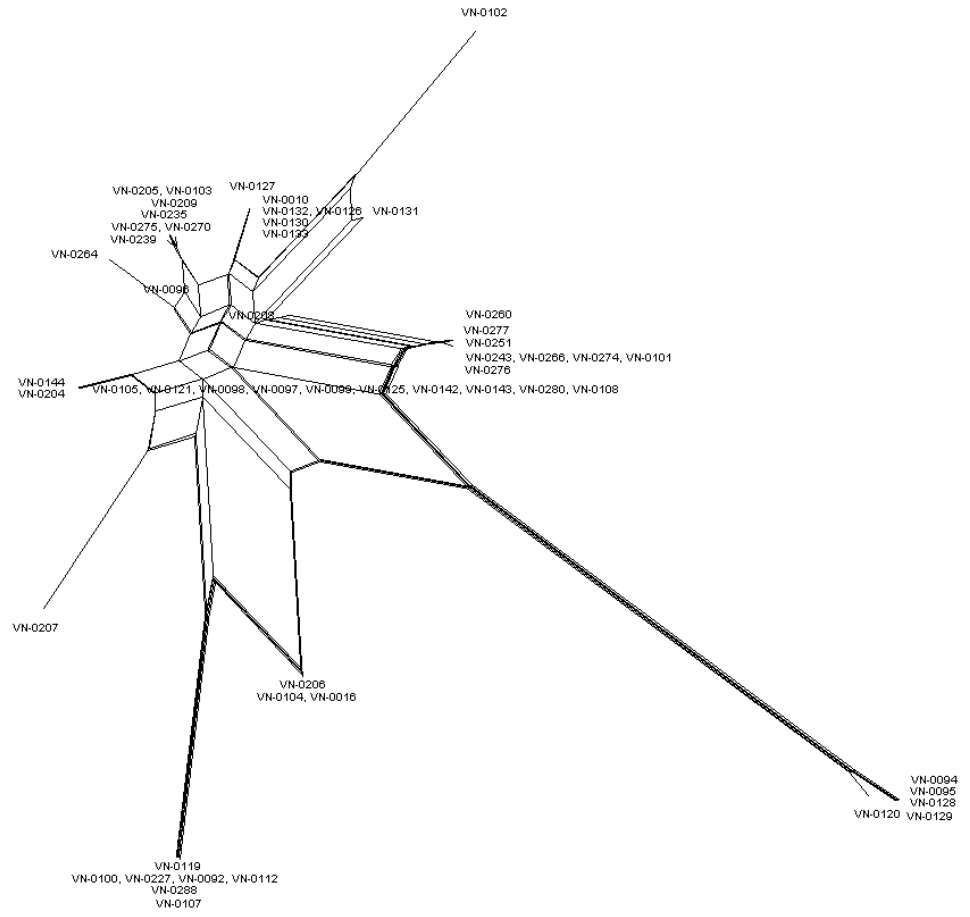

*lysA*

0,001

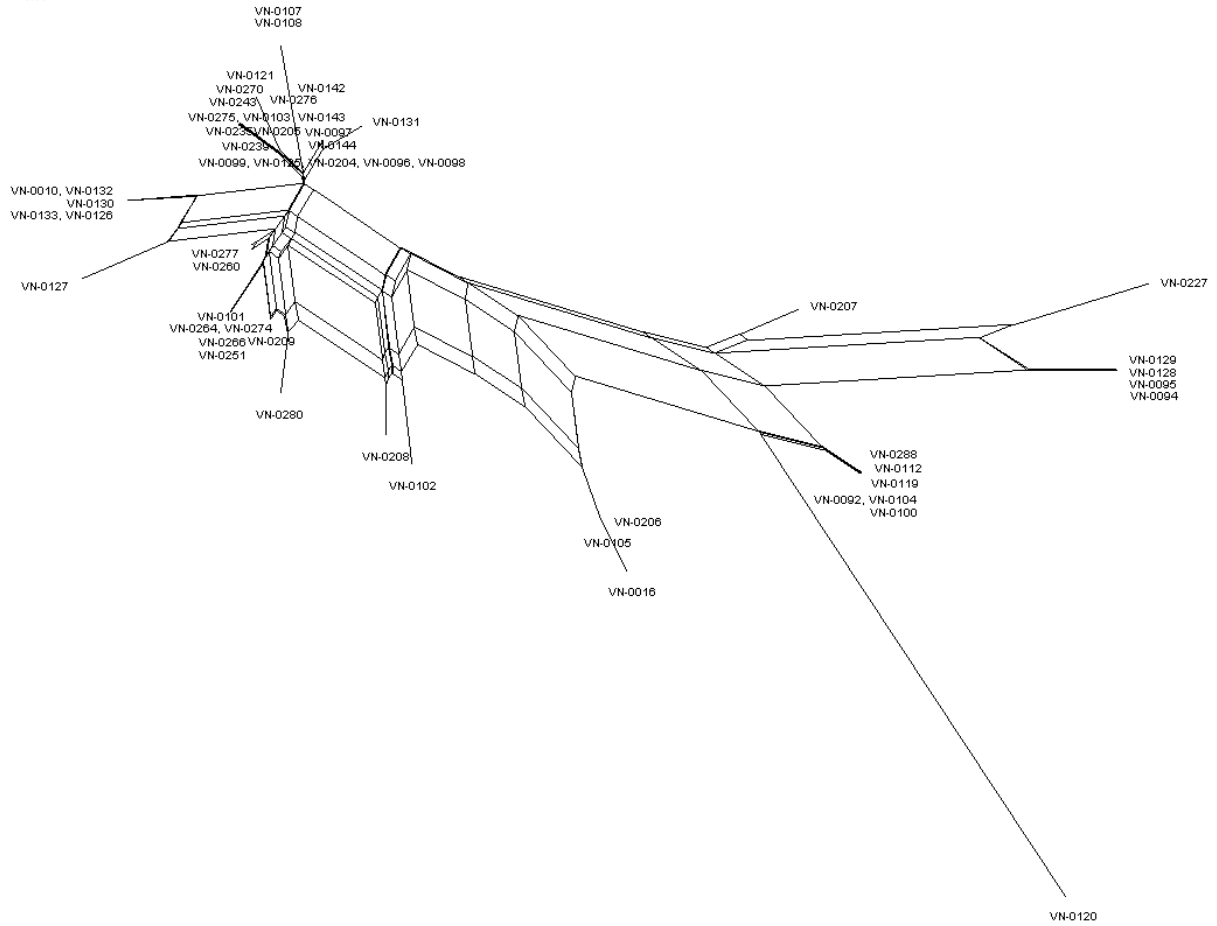

mdh

0.001

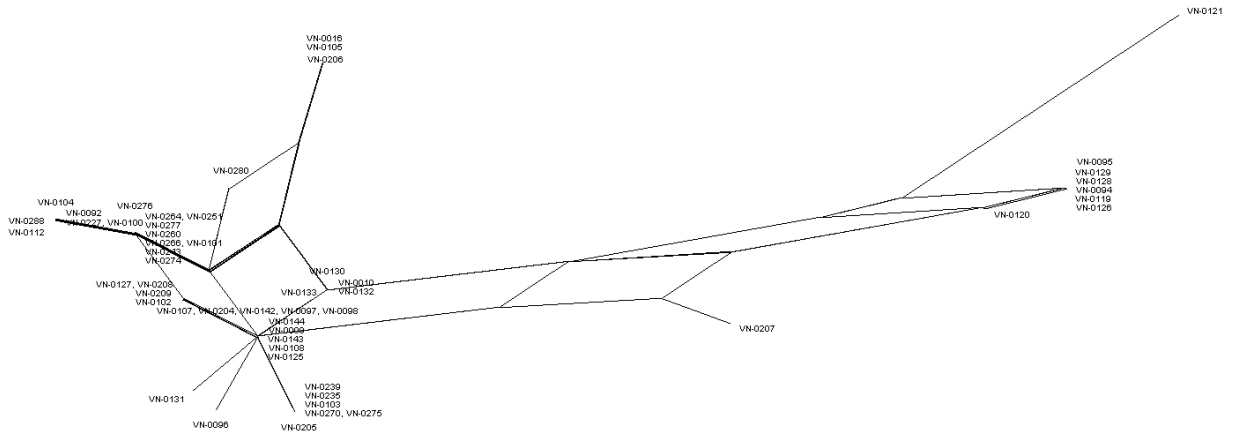

*metG*

1:0.001

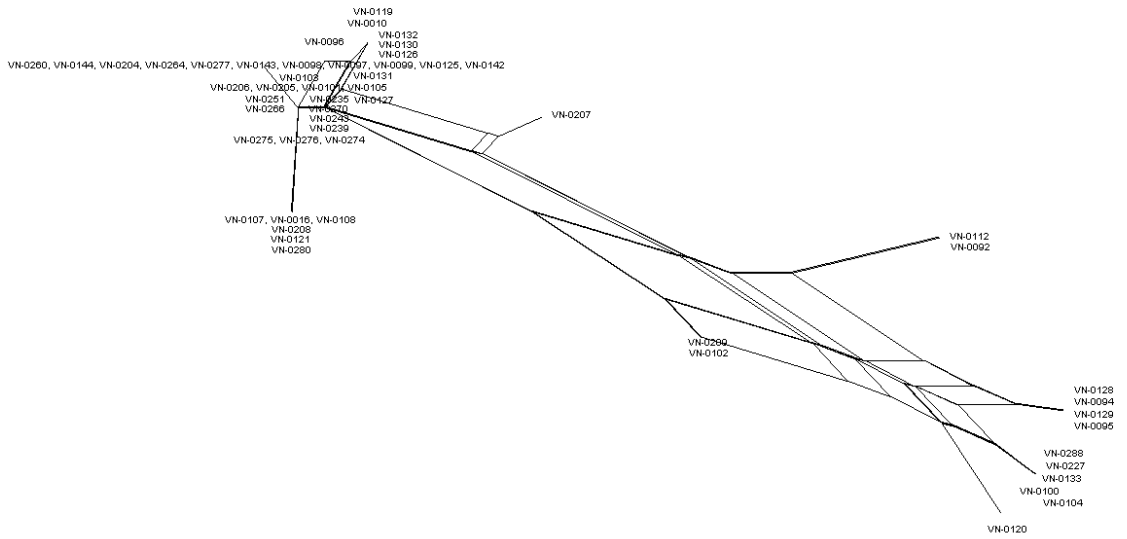

*pntA*

0.001

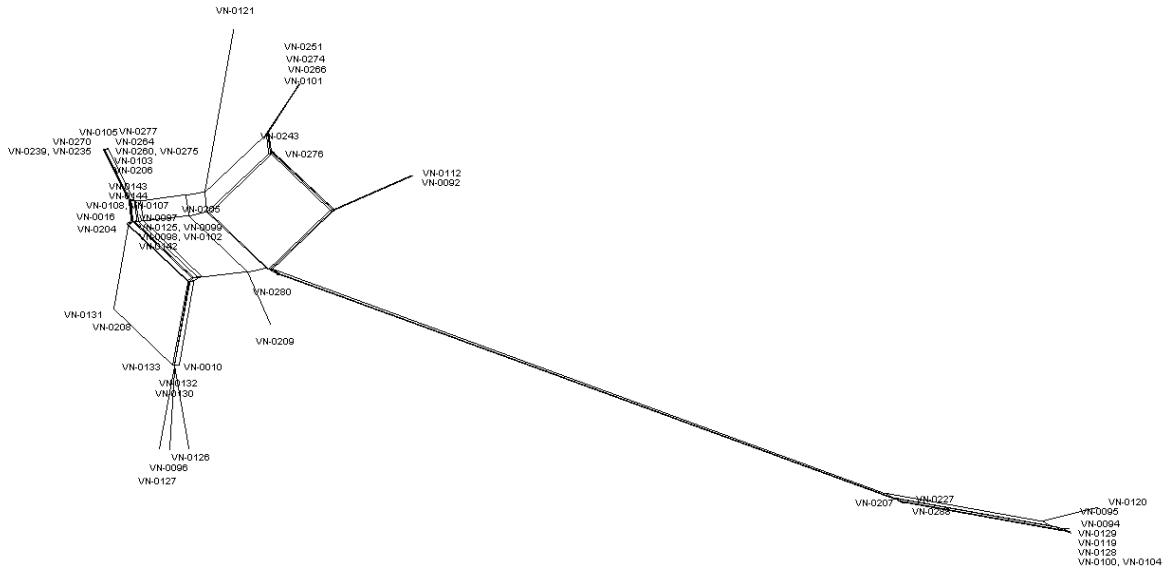



*purM*

1=0.001

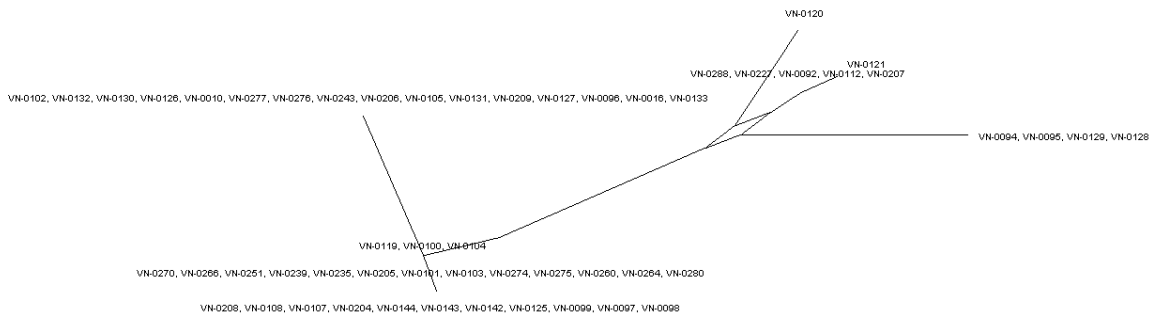

*pyrC*

0.001

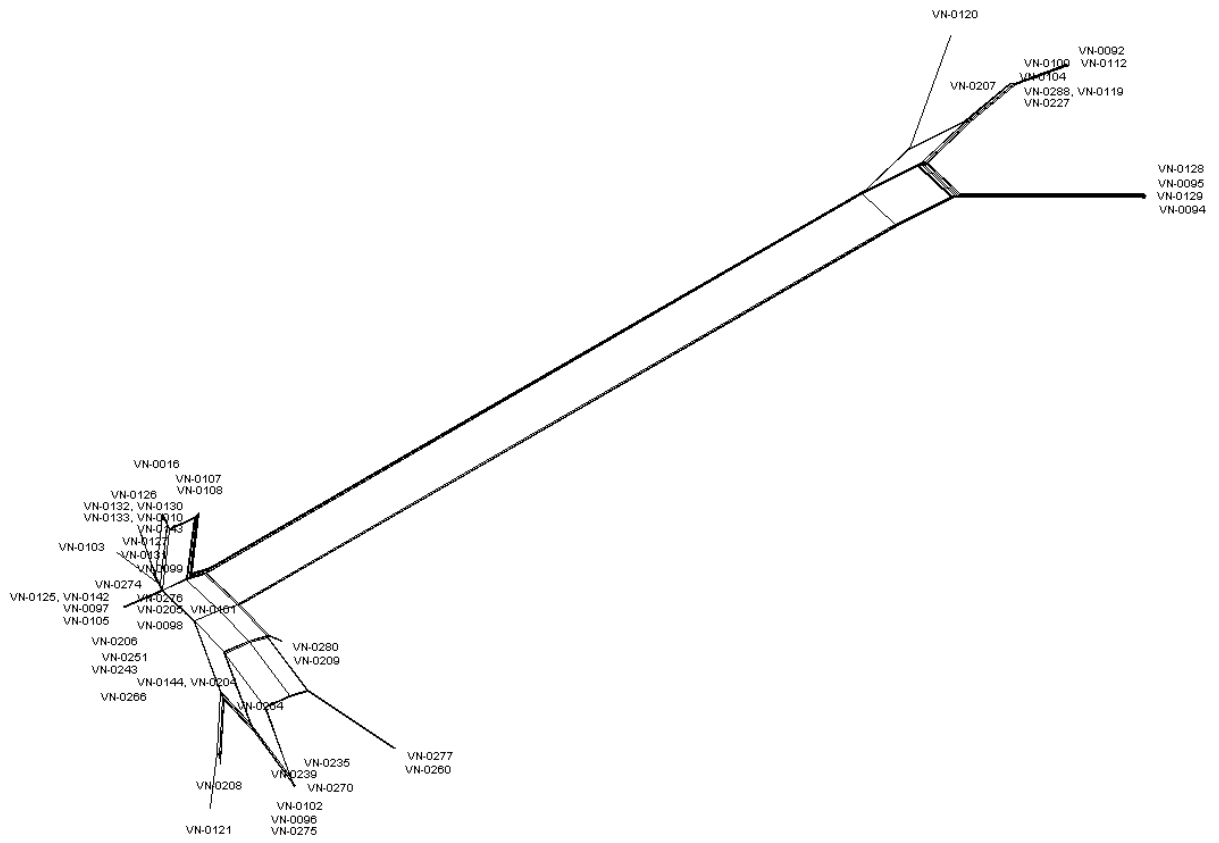

tnaA

10.01

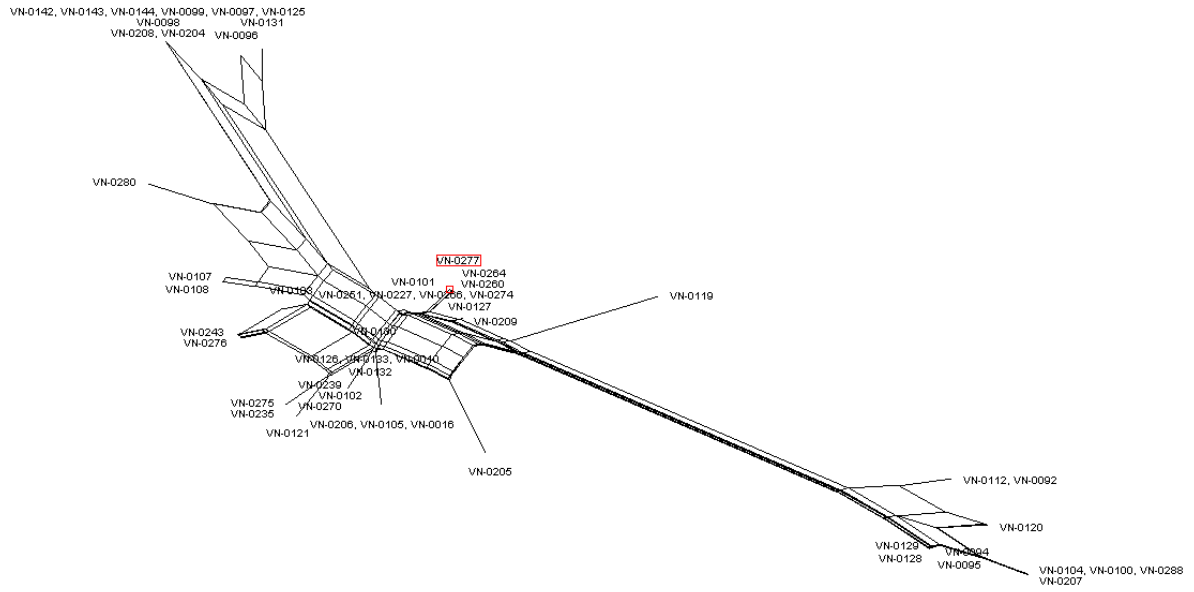

# concatenated sequences (all alleles)

0.001

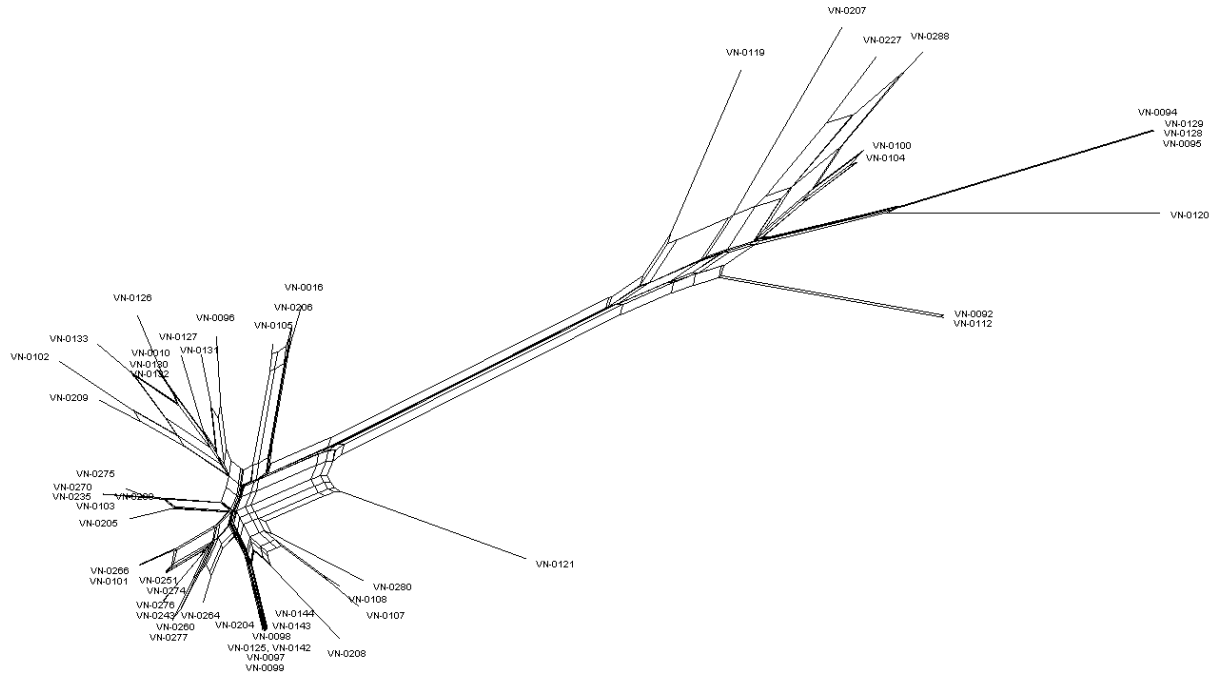

concatenated sequences (alleles from chromosome 1)

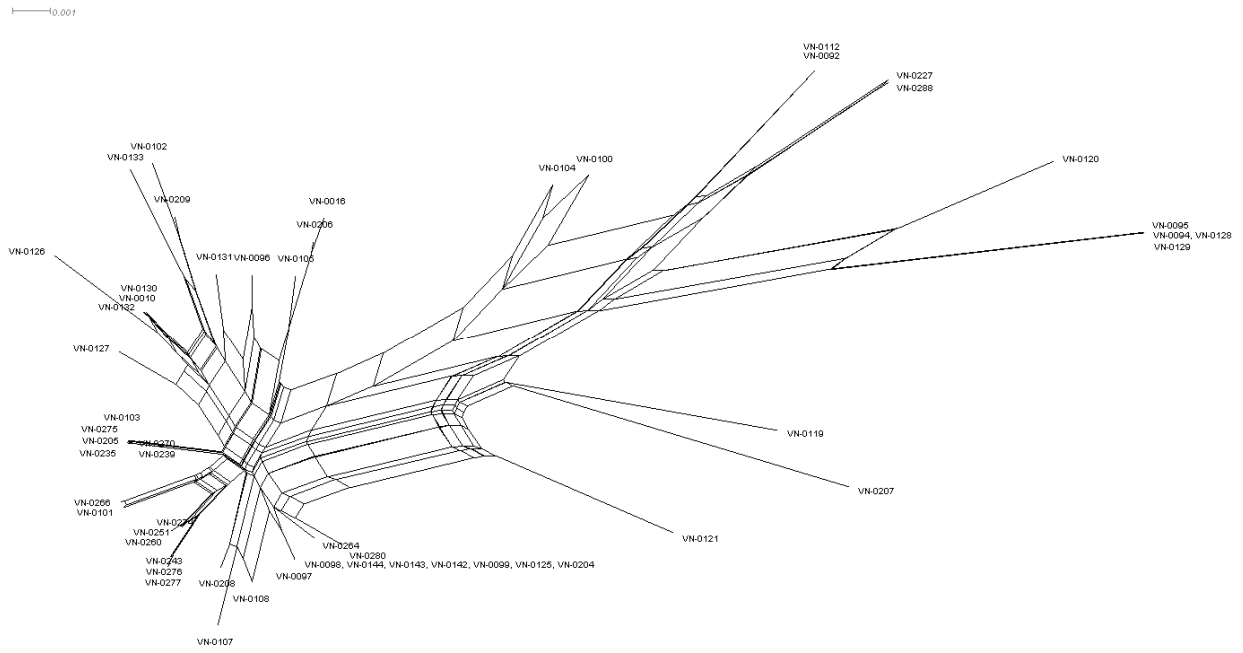

concatenated sequences (alleles from chromosome 2)

10.001

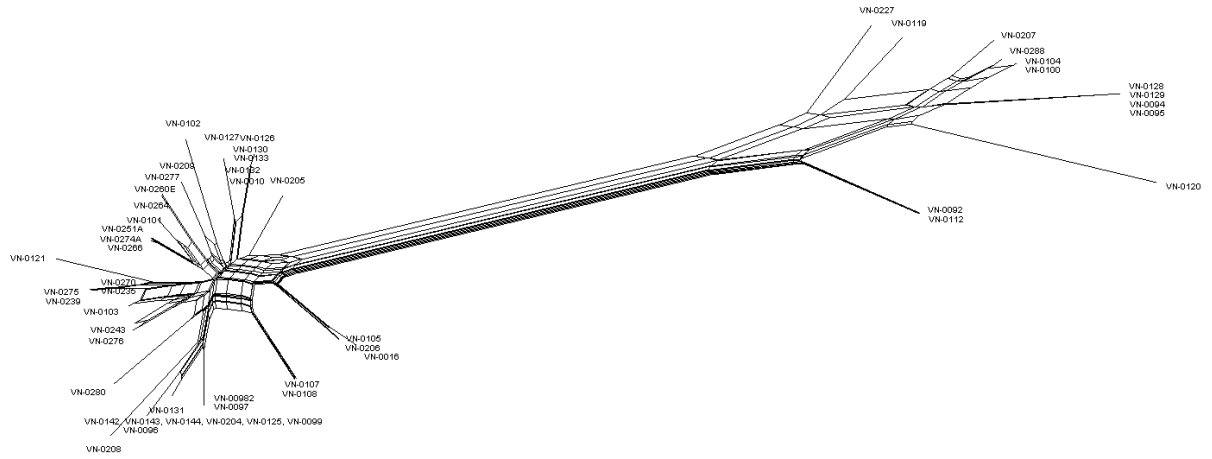

Figure S2. Quantitative hemolysis assay

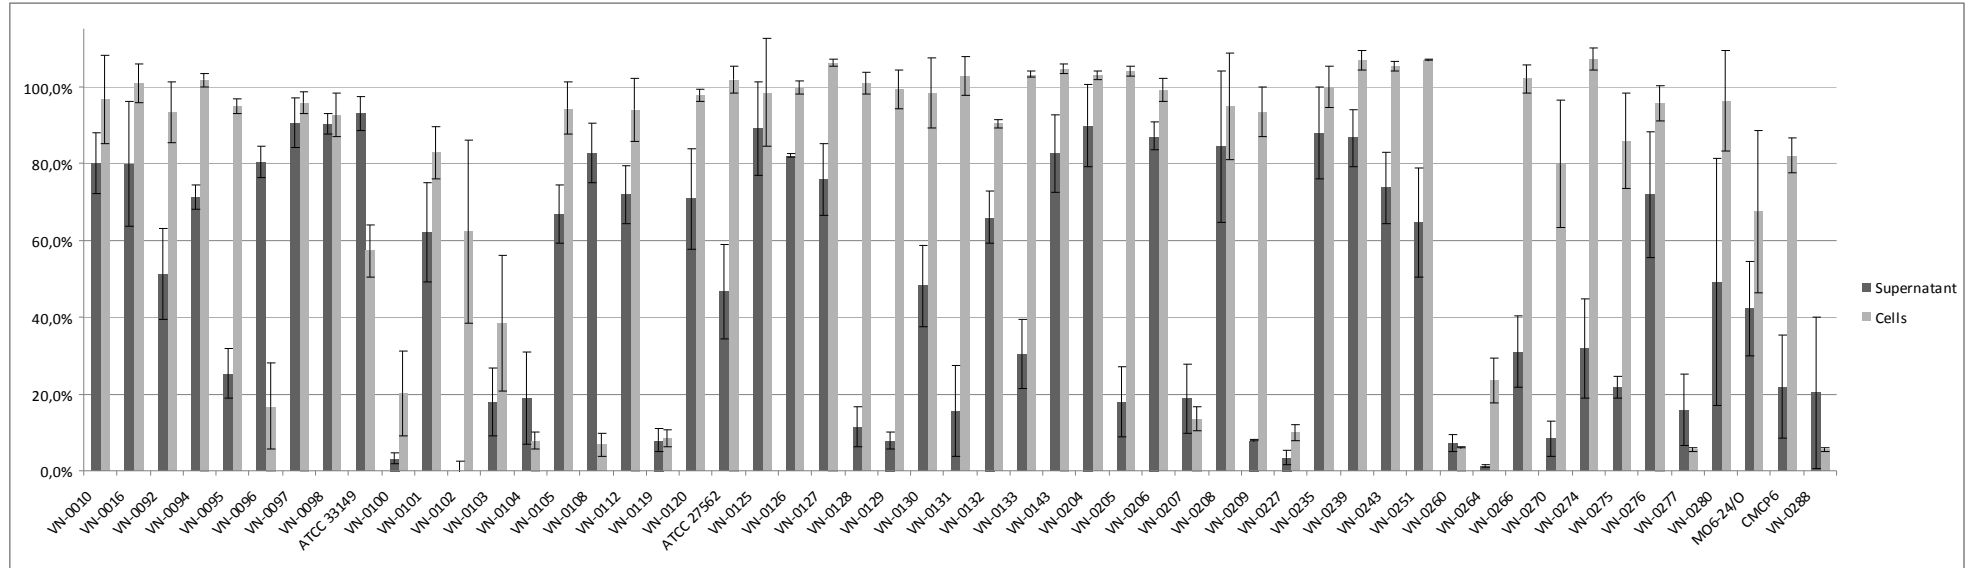

Supplement: AEM.00477-13_zam999104424so1.pdf [file AEM.00477-13_zam999104424so1.pdf]
